# Supplementary material for: Generalized high-temperature synthesis of zeolite catalysts with unpredictably high space-time yields (STYs)
Source: Royal Society of Chemistry journal article supplement (doi:10.1039/c6ta09866e), 2017-01-01
Supplement: c6ta09866e1.pdf [file c6ta09866e1.pdf]

## Supplementary Information

### **Generalized high-temperature synthesis of zeolite catalysts with unpredictably high space-time yields (STYs)**

Chaoqun Bian,<sup>a</sup> Changsheng Zhang,<sup>a</sup> Shuxiang Pan,<sup>a</sup> Fang Chen,<sup>a</sup> Weiping Zhang,<sup>b</sup>  
Xiangju Meng,<sup>\*,a</sup> Stefan Maurer,<sup>c</sup> Daniel Dai,<sup>c</sup> Andrei-Nicolae Parvulescu,<sup>d</sup> Ulrich  
Müller,<sup>d</sup> and Feng-Shou Xiao.<sup>\*,a</sup>

<sup>a</sup> Key Lab of Applied Chemistry of Zhejiang Province, Department of Chemistry,  
Zhejiang University, Hangzhou 310007, China.

<sup>b</sup> State Key Laboratory of Fine Chemicals, Dalian University of Technology,  
Linggong Road 2, Dalian 116024, China.

<sup>c</sup> BASF Catalysts (Shanghai) Co., Ltd., 239 Luqiao Road, Jinqiao Export Process  
Zone Pudong New District, Shanghai, 201206, China.

<sup>d</sup> BASF SE, GCC/PZ - M311, 67056 Ludwigshafen, Germany.

**Table S1 Textural parameters of various zeolites from hydrothermal routes**

| Sample   | BET Area <sup>a</sup><br>m <sup>2</sup> /g | Micropore Volume <sup>a</sup><br>cm <sup>3</sup> /g |
|----------|--------------------------------------------|-----------------------------------------------------|
| C-MFI    | 360                                        | 0.16                                                |
| C-MOR    | 401                                        | 0.19                                                |
| C-Beta   | 460                                        | 0.20                                                |
| C-RUB-36 | 300                                        | 0.13                                                |

<sup>a</sup> The data were measured with H-form of zeolites synthesized from hydrothermal routes.

**Table S2 RUB-36 zeolites synthesized from solvent-free and hydrothermal routes**

| Run | DMDEA/Si | Temperature (°C) | Time (day) | Zeolite type |
|-----|----------|------------------|------------|--------------|
| 1   | 0.07     | 140              | 20         | RUB-36       |
| 2   | 0.07     | 160              | 9          | RUB-36       |
| 3   | 0.07     | 180              | 3          | RUB-36       |
| 4   | 0.07     | 200              | 1.5        | RUB-36       |
| 5   | 0.43     | 140              | 14         | RUB-36       |
| 6   | 0.43     | 160              | 9          | Amor         |
| 7   | 0.43     | 180              | 3          | Amor         |
| 8   | 0.43     | 200              | 2          | Amor         |

## Supplementary Figure Captions

**Fig. S1** XRD patterns of the S-RUB-36-temp synthesized at (a) 140 °C for 20 days, (b) 160 °C for 9 days, (c) 180 °C for 3 days, and (d) 200 °C for 1.5 days.

**Fig. S2** (a) XRD pattern and (b) SEM image of the C-RUB-36-140.

**Fig. S3** TG curves of the (a) C-RUB-36-140, (b) S-RUB-36-140, and (c) S-RUB-36-180.

**Fig. S4** <sup>29</sup>Si MAS NMR spectra of the (a) C-RUB-36, (b) S-RUB-36-140, and (c) S-RUB-36-180.

**Fig. S5** XRD patterns of the S-RUB-36-180 crystallized at (a) 0, (b) 0.25, (c) 0.5, (d) 1.0, (e) 3.0, and (f) 4.0 days, respectively.

**Fig. S6** SEM images of the S-RUB-36-180 crystallized at (a) 0, (b) 0.25, (c) 0.5, (d) 1.0, (e) 3.0, and (f) 4.0 days, respectively.

**Fig. S7** Photographs of the S-RUB-36-180 crystallized at (a) 0, (b) 0.5, (c) 1.0, and (d) 4.0 days, respectively.

**Fig. S8** <sup>29</sup>Si MAS NMR spectra of the S-RUB-36-180 crystallized at (a) 0, (b) 1.0, and (c) 4.0 days, respectively.

**Fig. S9** XRD patterns of the S-RUB-36-140 crystallized at (a) 0, (b) 10, (c) 15, (d) 20, and (e) 25 days, respectively.

**Fig. S10** The dependences of crystallinity on the crystallization time of the (a) C-RUB-36-140, (b) S-RUB-36-140, and (c) S-RUB-36-180.

**Fig. S11** (A) SEM images and (B) XRD patterns of the (a) Beta seeds, (b) MFI seeds, and (c) MOR seeds.

**Fig. S12** (A) SEM images and (B) XRD patterns of the S-Beta-200 crystallized at (a) 0, (b) 0.5, (c) 1, (d) 1.5, (e) 4, and (f) 5 h, respectively. There is impurity of MOR zeolite when the crystallization time reaches to 5 h.

**Fig. S13** (A) SEM images and (B) XRD patterns of the S-MFI-240 crystallized at (a) 0, (b) 0.35, and (c) 0.5 h, respectively.

**Fig. S14** (A) SEM images and (B) XRD patterns of the S-MOR-240 crystallized at (a) 0, (b) 1, and (c) 1.5 h, respectively.

**Fig. S15** Catalytic conversion and product selectivities over S-ZSM-5-240 catalyst in MTO (■ C<sub>1</sub>; ▲ C<sub>2-4</sub>; ▼ C<sub>2</sub><sup>-</sup>; ◀ C<sub>3</sub><sup>-</sup>; ◆ C<sub>4</sub><sup>-</sup>; ⊕ C<sub>5</sub>+ aromatics; ► Conv. ).

**Fig. S16** Catalytic conversion and product selectivities over ZSM-5 catalyst by hydrothermal method at 180 °C in MTO (■ C<sub>1</sub>; ▲ C<sub>2-4</sub>; ▼ C<sub>2</sub><sup>-</sup>; ◀ C<sub>3</sub><sup>-</sup>; ◆ C<sub>4</sub><sup>-</sup>; ⊕ C<sub>5</sub>+ aromatics; ► Conv., the Si/Al ratio is 128 measured by ICP)

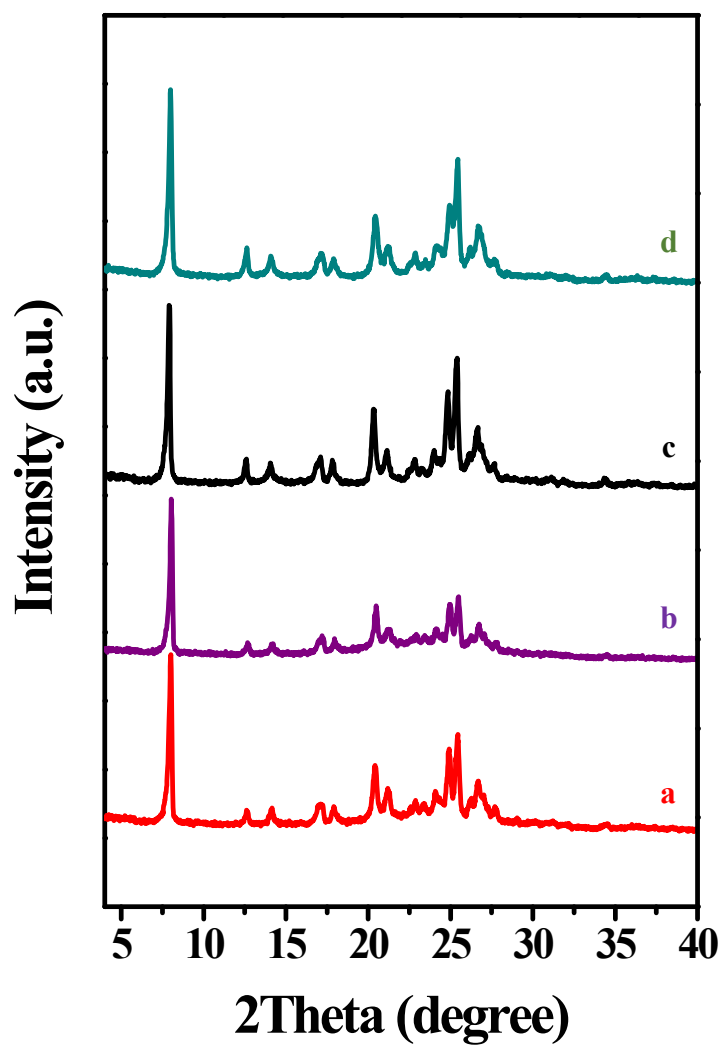

**Fig. S1** XRD patterns of the S-RUB-36-temp synthesized at (a) 140 °C for 20 days, (b) 160 °C for 9 days, (c) 180 °C for 3 days, and (d) 200 °C for 1.5 days.

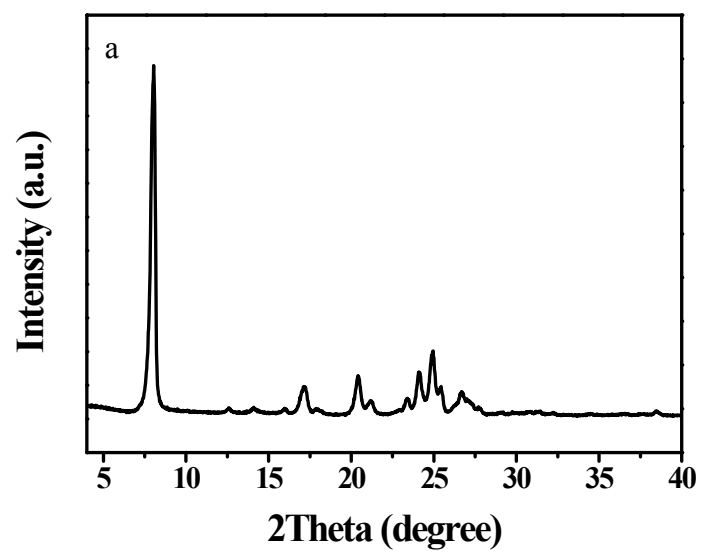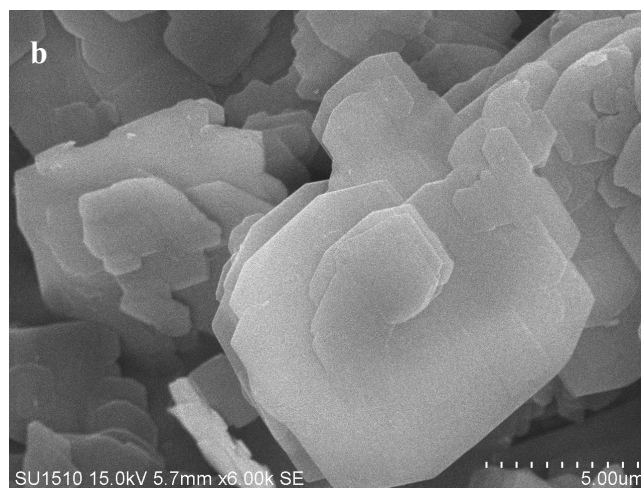

**Fig. S2** (a) XRD pattern and (b) SEM image of the C-RUB-36-140.

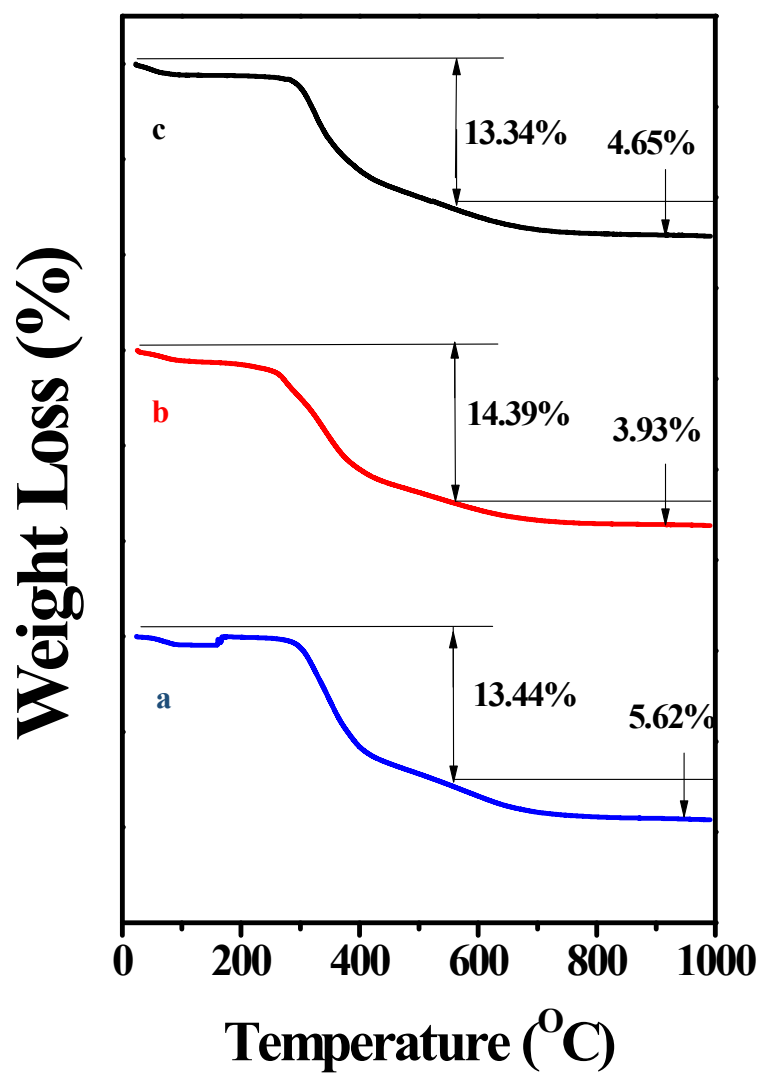

**Fig. S3** TG curves of the (a) C-RUB-36-140, (b) S-RUB-36-140, and (c) S-RUB-36-180.



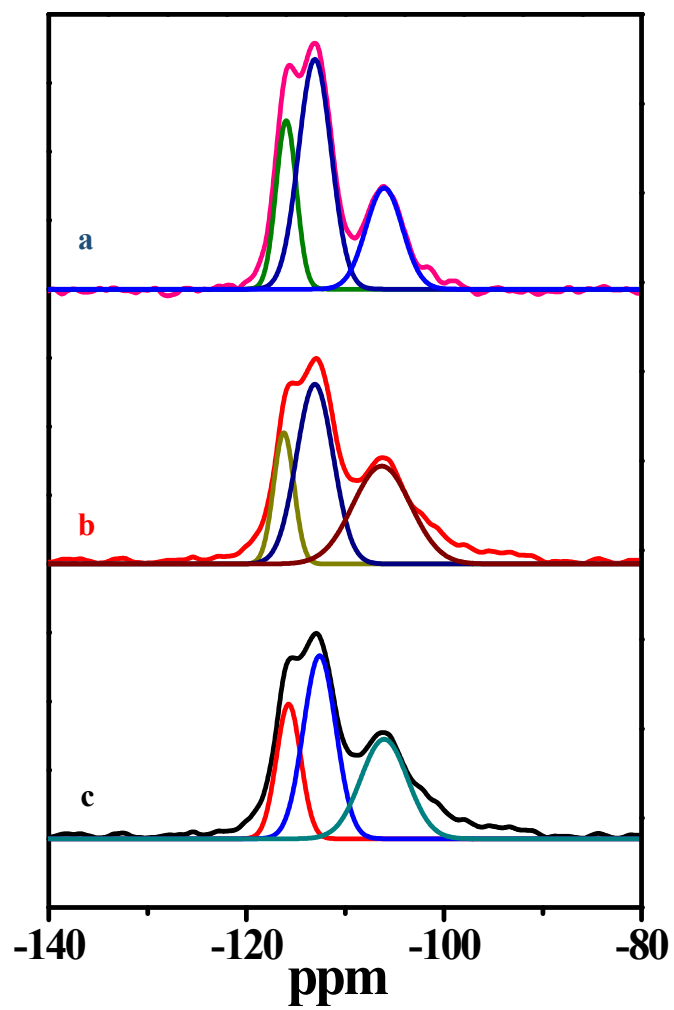

**Fig. S4**  $^{29}\text{Si}$  MAS NMR spectra of the (a) C-RUB-36-140, (b) S-RUB-36-140, and (c) S-RUB-36-180.

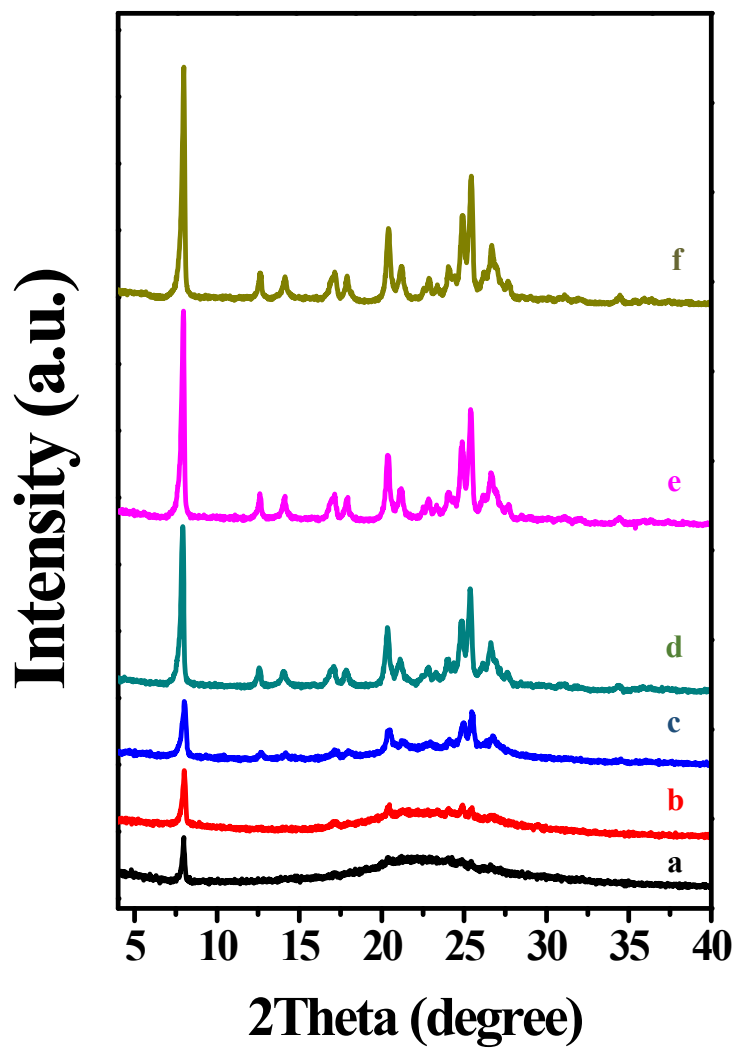

**Fig. S5** XRD patterns of the S-RUB-36-180 crystallized at (a) 0, (b) 0.25, (c) 0.5, (d) 1.0, (e) 3.0, and (f) 4.0 days, respectively.

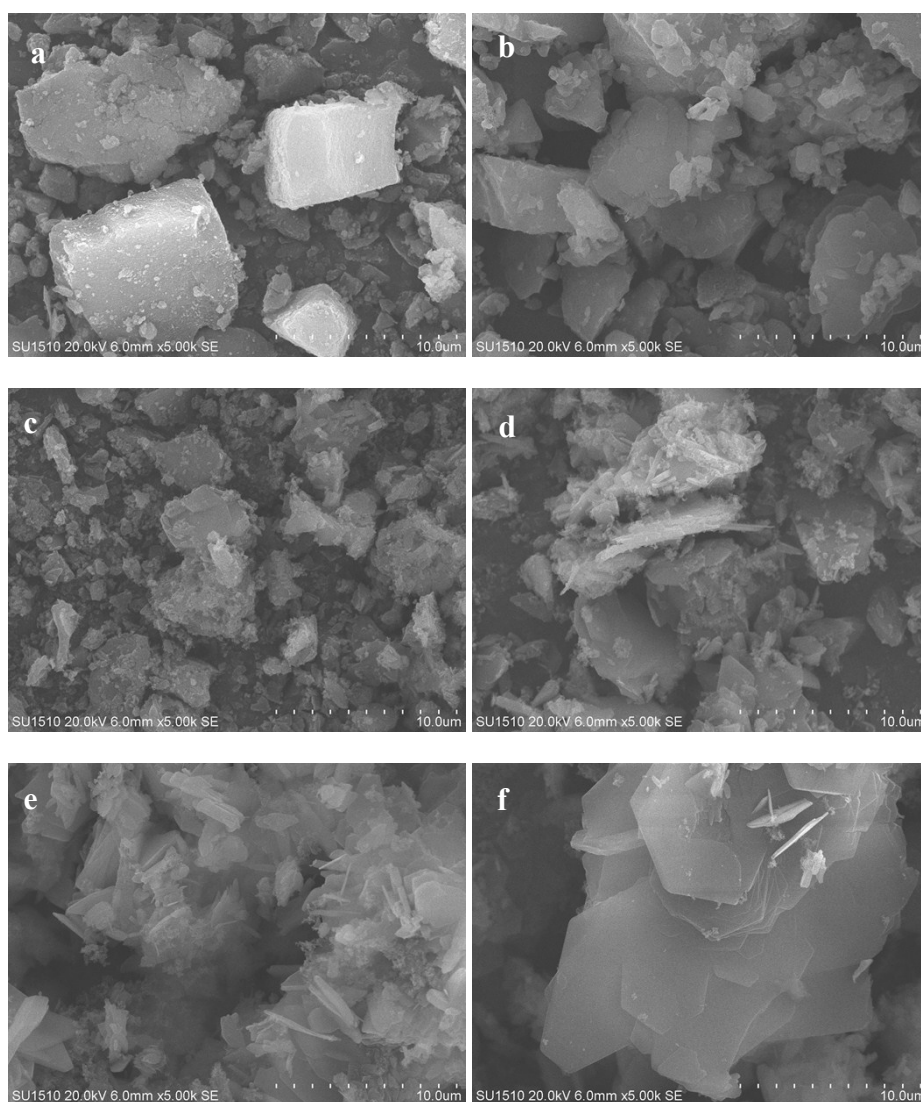

**Fig. S6** SEM images of the S-RUB-36-180 crystallized at (a) 0, (b) 0.25, (c) 0.5, (d) 1.0, (e) 3.0, and (f) 4.0 days, respectively.

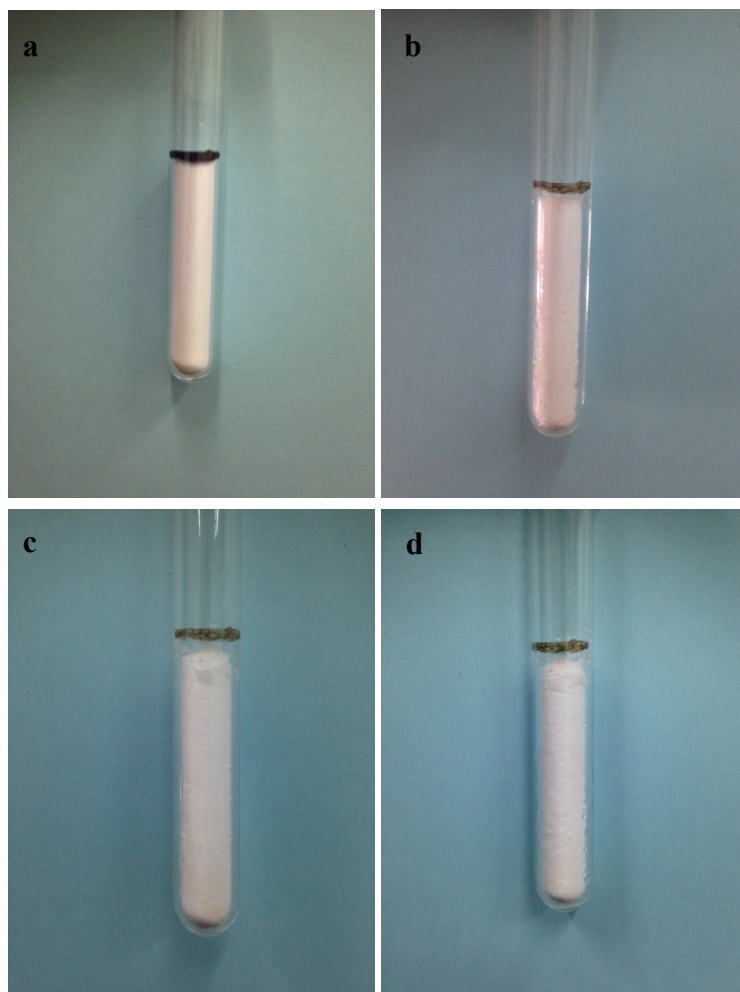

**Fig. S7** Photographs of the S-RUB-36-180 crystallized at (a) 0, (b) 0.5, (c) 1.0, and (d) 4.0 days, respectively.

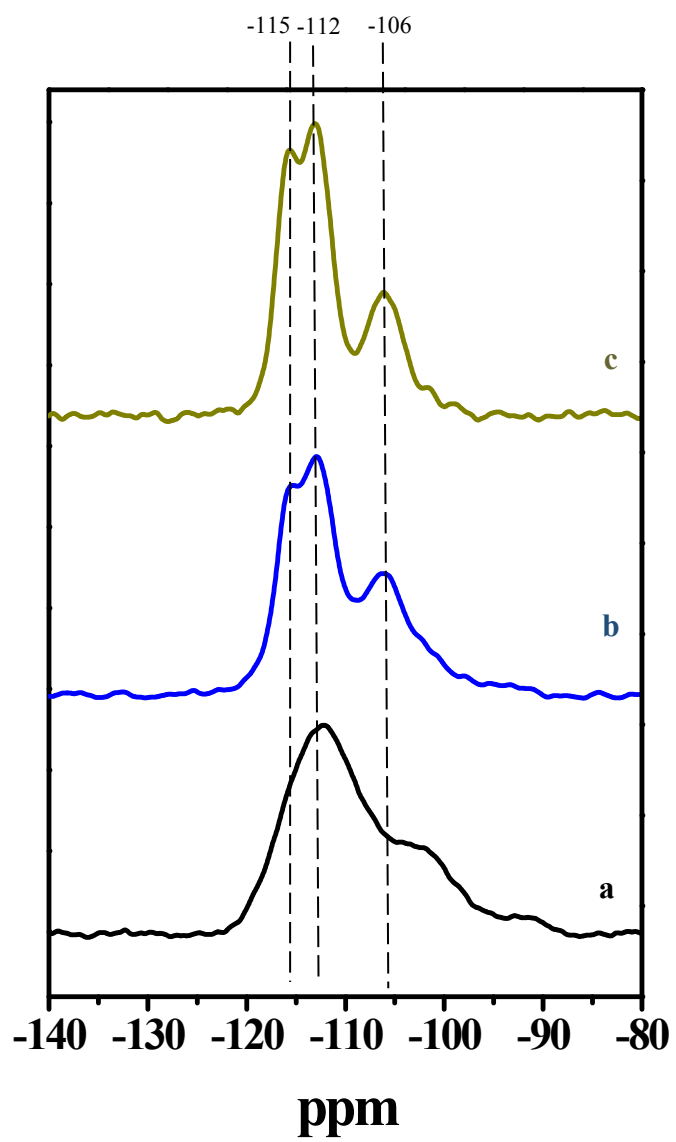

**Fig. S8**  $^{29}\text{Si}$  MAS NMR spectra of the S-RUB-36-180 crystallized at (a) 0, (b) 1.0, and (c) 4.0 days, respectively.

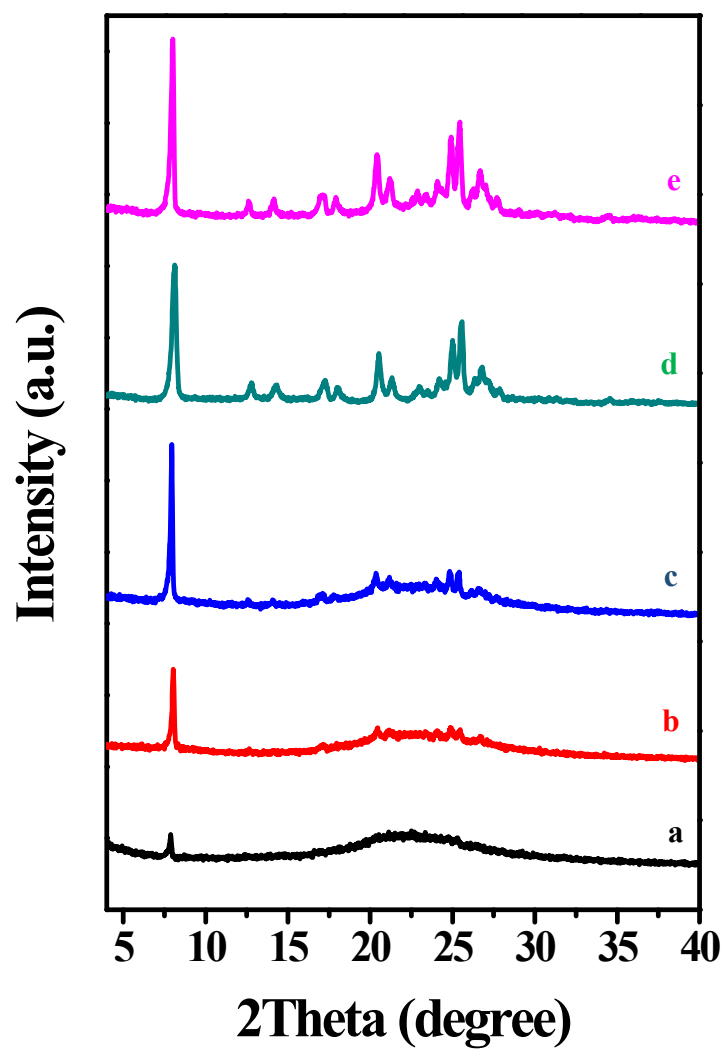

**Fig. S9** XRD patterns of the S-RUB-36-140 crystallized at (a) 0, (b) 10, (c) 15, (d) 20, and (e) 25 days, respectively.

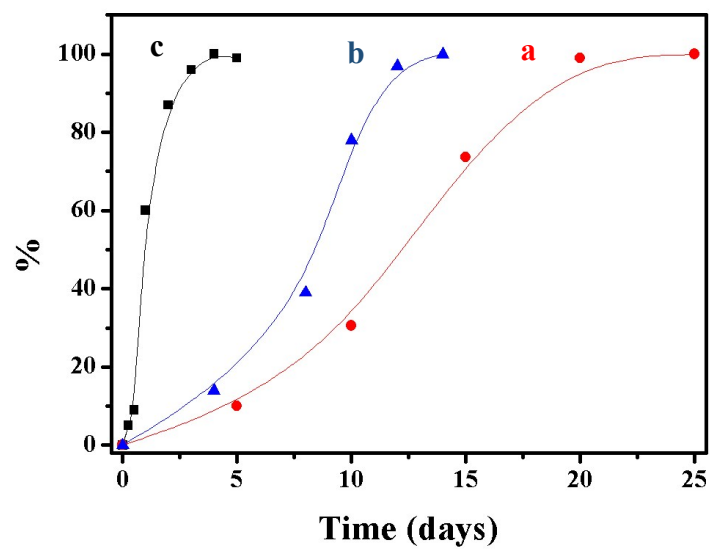

**Fig. S10** The dependences of crystallinity on the crystallization time of the (a) C-RUB-36-140, (b) S-RUB-36-140, and (c) S-RUB-36-180.

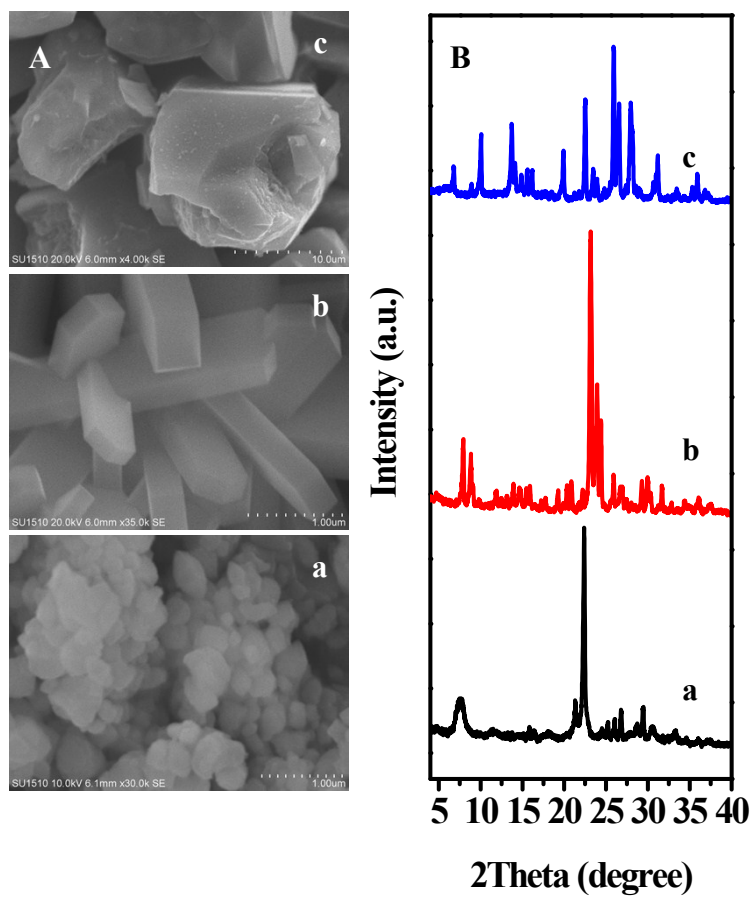

**Fig. S11** (A) SEM images and (B) XRD patterns of the (a) Beta seeds, (b) MFI seeds, and (c) MOR seeds.



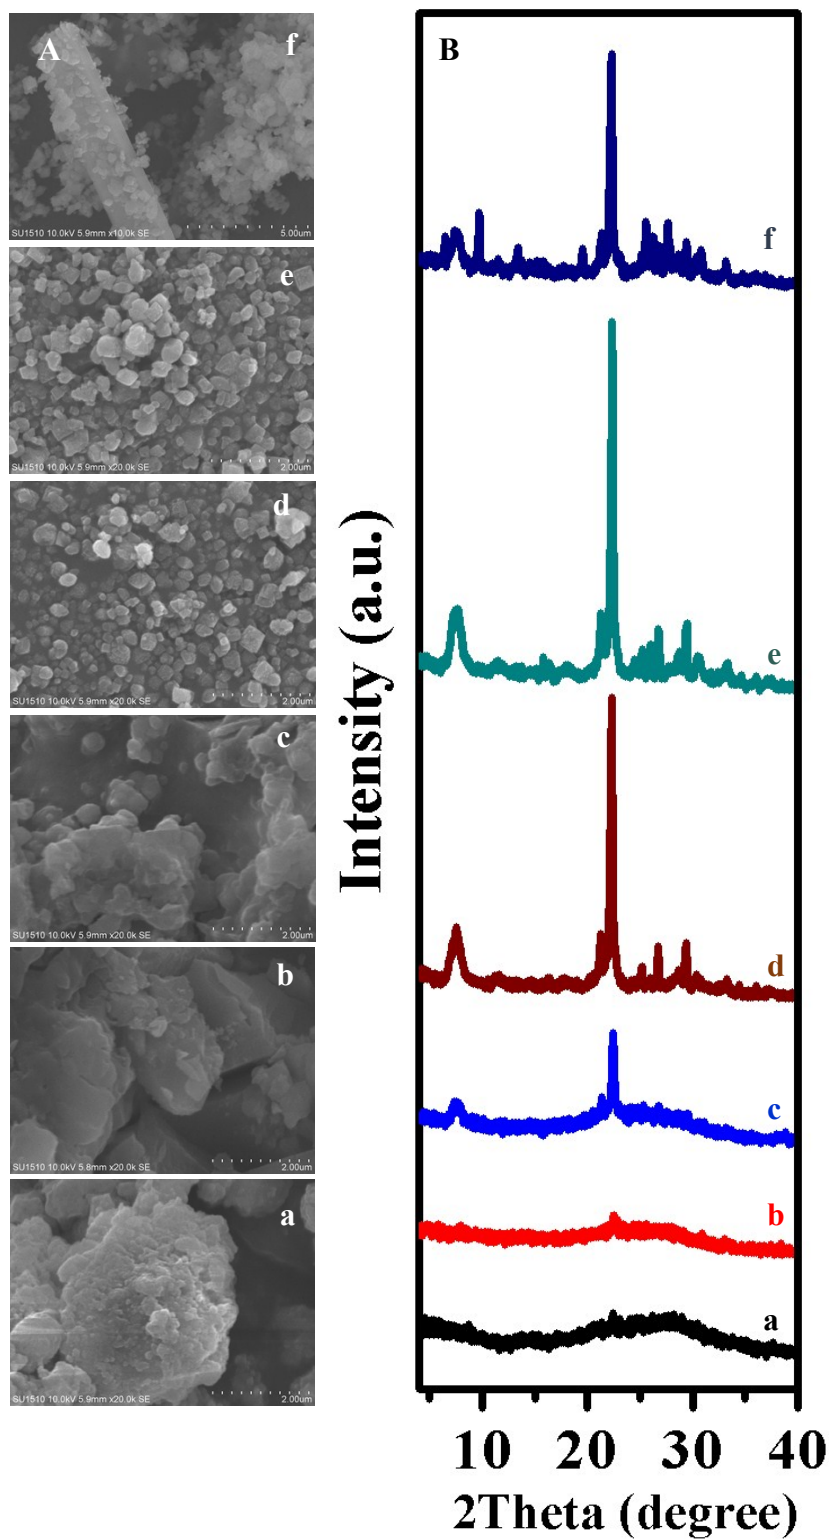

**Fig. S12** (A) SEM images and (B) XRD patterns of the S-Beta-200 crystallized at (a) 0, (b) 0.5, (c) 1, (d) 1.5, (e) 4, and (f) 5 h, respectively. There is impurity of MOR zeolite when the crystallization time reaches to 5 h.

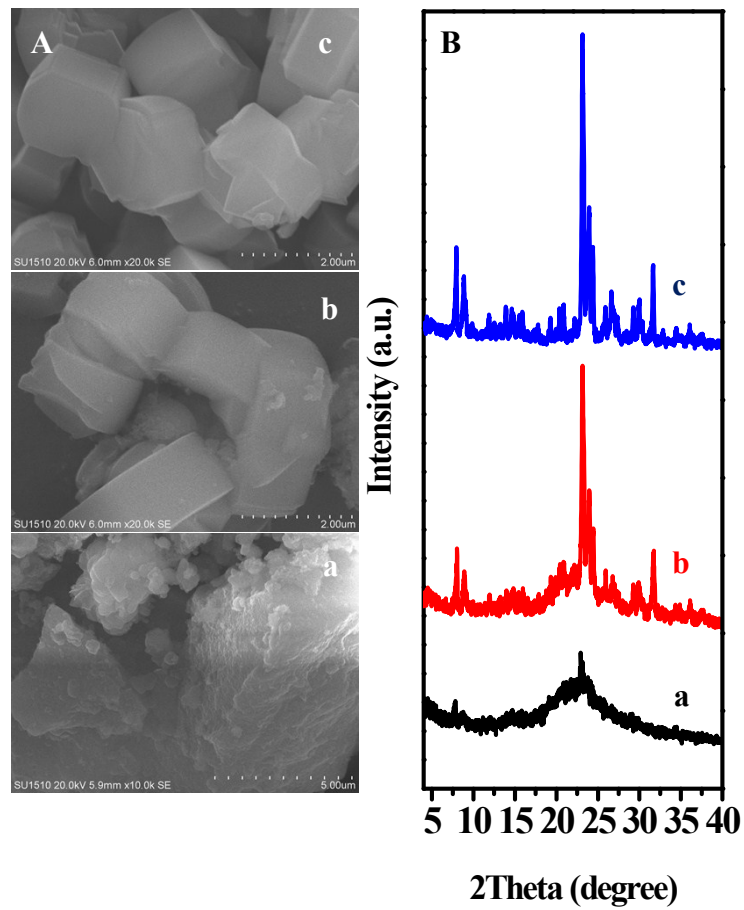

**Fig. S13** (A) SEM images and (B) XRD patterns of the S-MFI-240 crystallized at (a) 0, (b) 0.35, and (c) 0.5 h, respectively.

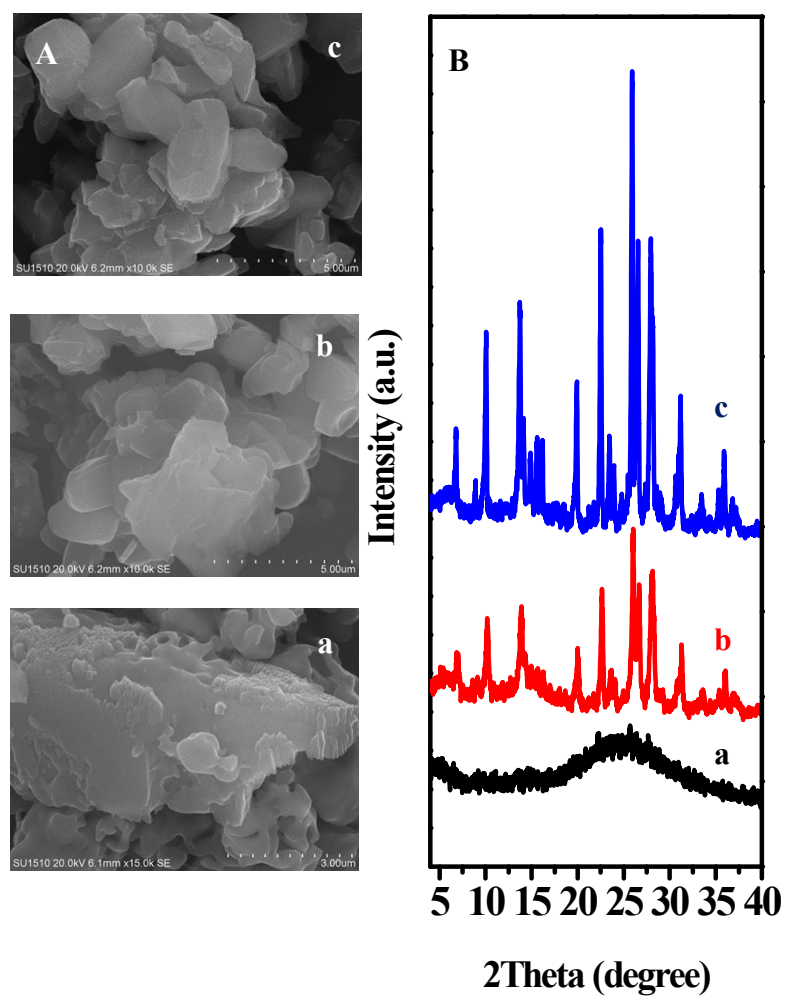

**Fig. S14** (A) SEM images and (B) XRD patterns of the S-MOR-240 crystallized at (a) 0, (b) 1, and (c) 1.5 h, respectively.

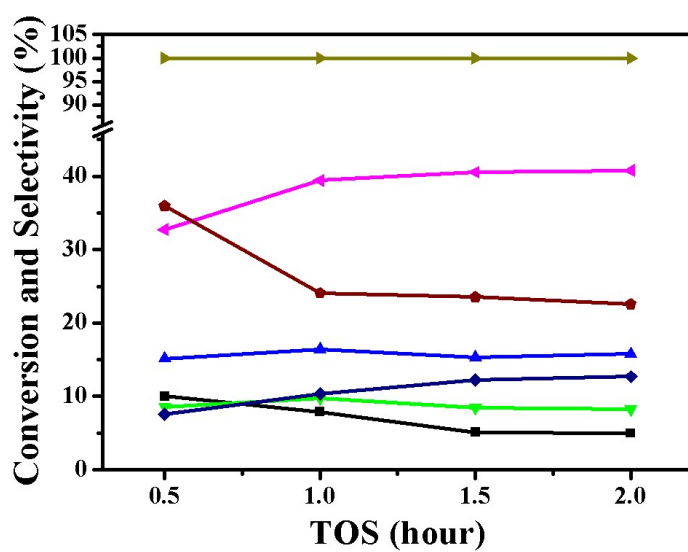

**Fig. S15** Catalytic conversion and product selectivities over S-ZSM-5-240 catalyst in

MTO (■ C<sub>1</sub>; ▲ C<sub>2-4</sub>; ▼ C<sub>2</sub><sup>-</sup>; ◀ C<sub>3</sub><sup>-</sup>; ◆ C<sub>4</sub><sup>-</sup>; ⊕ C<sub>5</sub>+aromatics; ► Conv. ).

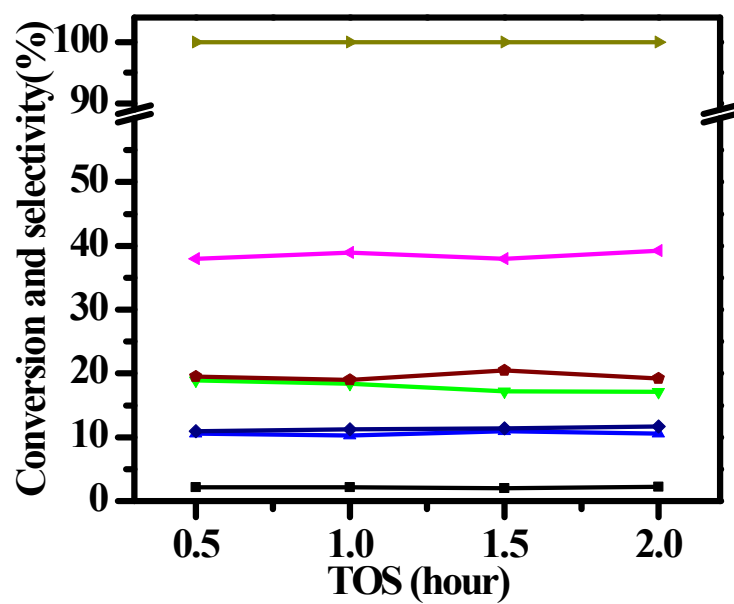

**Fig. S16** Catalytic conversion and product selectivities over ZSM-5 catalyst by hydrothermal method at 180 °C in MTO (■ C<sub>1</sub>; ▲ C<sub>2-4</sub>; ▼ C<sub>2</sub><sup>-</sup>; ◀ C<sub>3</sub><sup>-</sup>; ◆ C<sub>4</sub><sup>-</sup>; ⊕ C<sub>5</sub>+aromatics; ► Conv., the Si/Al ratio is 128 measured by ICP)
